# Supplementary material for: Implications of Diet for the Extinction of Saber-Toothed Cats and American Lions
Source: PubMed Central journal article supplement (PMC3530457; doi:10.1371/journal.pone.0052453), 2012-12-26
Supplement: pone.0052453.s002.pdf [file pone.0052453.s002.pdf]

**Table S2.** Standardized differences between ranked data.

|                              | <i>C. crocuta</i> | <i>P. leo</i> | <i>P. atrox</i> | <i>S. fatalis</i> |
|------------------------------|-------------------|---------------|-----------------|-------------------|
| <i>Asfc</i>                  |                   |               |                 |                   |
| <i>A. jubatus</i>            | <b>8.0**</b>      | <b>6.5**</b>  | 0.7             | <b>4.0**</b>      |
| <i>C. crocuta</i>            |                   | <b>2.0*</b>   | <b>8.4**</b>    | <b>4.8**</b>      |
| <i>P. leo</i>                |                   |               | <b>6.7**</b>    | <b>2.9**</b>      |
| <i>P. atrox</i>              |                   |               |                 | <b>3.8**</b>      |
| <i>epLsar</i>                |                   |               |                 |                   |
| <i>A. jubatus</i>            | <b>2.9**</b>      | <b>3.2**</b>  | <b>2.8**</b>    | <b>4.2**</b>      |
| <i>C. crocuta</i>            |                   | 0.2           | 0.3             | 1.2               |
| <i>P. leo</i>                |                   |               | 0.4             | 1.1               |
| <i>P. atrox</i>              |                   |               |                 | 1.5               |
| <i>Smc</i>                   |                   |               |                 |                   |
| <i>A. jubatus</i>            | <b>3.1**</b>      | 2.0           | 1.6             | 0.0               |
| <i>C. crocuta</i>            |                   | 1.4           | <b>5.3**</b>    | <b>3.1**</b>      |
| <i>P. leo</i>                |                   |               | <b>4.1**</b>    | <b>2.3*</b>       |
| <i>P. atrox</i>              |                   |               |                 | 1.8               |
| <i>Tfv</i>                   |                   |               |                 |                   |
| <i>A. jubatus</i>            | <b>3.5**</b>      | <b>2.5*</b>   | 0.4             | <b>2.5*</b>       |
| <i>C. crocuta</i>            |                   | 1.2           | <b>3.5**</b>    | 1.2               |
| <i>P. leo</i>                |                   |               | <b>2.4*</b>     | 0.0               |
| <i>P. atrox</i>              |                   |               |                 | <b>2.4*</b>       |
| <i>HAsfc<sub>(9x9)</sub></i> |                   |               |                 |                   |
| <i>A. jubatus</i>            | 1.6               | 0.9           | <b>2.6*</b>     | <b>3.2**</b>      |
| <i>C. crocuta</i>            |                   | 0.8           | 1.1             | 1.7               |
| <i>P. leo</i>                |                   |               | <b>2.0*</b>     | <b>2.7*</b>       |
| <i>P. atrox</i>              |                   |               |                 | 0.7               |

\*Significant values based on Fisher's LSD test are noted in bold text ( $p < 0.05$ ; critical value is 2.0).

\*\*Significant values ( $p < 0.05$ ) based on both Fisher's LSD and Tukey's HSD tests (critical value is 2.81). *Asfc*, area-scale fractal complexity; *epLsar*, anisotropy; *Smc*, scale of maximum complexity; *Tfv*, texture fill volume; *HAsfc<sub>(9x9)</sub>* heterogeneity of complexity in a 9x9 grid, *HAsfc<sub>(3x3)</sub>* values are excluded as there are no significant differences between any extant or extinct taxa.
