# Supplementary material for: Implications of Diet for the Extinction of Saber-Toothed Cats and American Lions
Source: PLoS One. 2012 Dec 26;7(12):e52453. doi: 10.1371/journal.pone.0052453 (PMC3530457; doi:10.1371/journal.pone.0052453)
Supplement: Table S1 — All carnivoran specimens examined and dental microwear characters. (PDF) [file pone.0052453.s001.pdf]

**Table S1.** All carnivoran specimens examined and dental microwear characters.

| Taxon                   | Status/Pit | Museum | ID     | <i>Asfc</i> | <i>epLsar</i> | <i>Smc</i> | <i>Tfv</i> | <i>HAsfc</i> <sub>(3x3)</sub> | <i>HAsfc</i> <sub>(9x9)</sub> | Data |
|-------------------------|------------|--------|--------|-------------|---------------|------------|------------|-------------------------------|-------------------------------|------|
| <i>Acinonyx jubatus</i> | extant     | AMNH   | 27897  | 1.821       | 0.0064        | 0.151      | 8347       | 0.952                         | 1.698                         | S    |
|                         |            | AMNH   | 119654 | 0.942       | 0.0045        | 0.341      | 11050      | 0.512                         | 1.032                         | S    |
|                         |            | AMNH   | 119656 | 0.817       | 0.0064        | 0.418      | 1618       | 0.399                         | 0.767                         | S    |
|                         |            | AMNH   | 119657 | 1.111       | 0.0045        | 0.209      | 38         | 0.543                         | 2.237                         | S    |
|                         |            | AMNH   | 161139 | 0.759       | 0.0038        | 0.150      | 0          | 0.739                         | 1.070                         | S    |
|                         |            | SAM    | 36849  | 2.645       | 0.0047        | 0.152      | 534        | 1.090                         | 3.257                         | S    |
|                         |            | SAM    | 38624  | 2.674       | 0.0056        | 0.208      | 6833       | 0.373                         | 0.734                         | S    |
|                         |            | USNM   | 161922 | 1.767       | 0.0030        | 0.601      | 2581       | 0.345                         | 0.799                         | U    |
|                         |            | USNM   | 540001 | 1.772       | 0.0051        | 0.345      | 14638      | 0.344                         | 0.539                         | U    |
| <i>Crocota crocuta</i>  | extant     | AMNH   | 20809  | 6.867       | 0.0038        | 0.150      | 16323      | 0.372                         | 0.627                         | S    |
|                         |            | AMNH   | 83591  | 2.280       | 0.0027        | 0.151      | 1234       | 0.604                         | 1.314                         | S    |
|                         |            | AMNH   | 83592  | 23.864      | 0.0019        | 0.152      | 15255      | 0.384                         | 0.672                         | S    |
|                         |            | AMNH   | 187771 | 16.047      | 0.0052        | 0.150      | 19699      | 0.250                         | 0.581                         | C    |
|                         |            | AMNH   | 187772 | 4.988       | 0.0036        | 0.151      | 10135      | 0.320                         | 0.556                         | C    |
|                         |            | AMNH   | 187774 | 7.273       | 0.0026        | 0.151      | 11482      | 0.532                         | 1.014                         | C    |
|                         |            | SAM    | 33341  | 5.669       | 0.0023        | 0.150      | 13029      | 0.790                         | 1.435                         | C    |
|                         |            | SAM    | 33432  | 4.594       | 0.0036        | 0.151      | 7761       | 0.507                         | 0.829                         | C    |
|                         |            | SAM    | 36871  | 10.538      | 0.0032        | 0.150      | 15994      | 0.262                         | 0.458                         | C    |
|                         |            | SAM    | 40361  | 18.553      | 0.0037        | 0.150      | 17531      | 0.446                         | 0.575                         | C    |
|                         |            | SAM    | 83593  | 7.658       | 0.0012        | 0.151      | 15610      | 0.328                         | 0.729                         | C    |
|                         |            | SAM    | 38817b | 3.445       | 0.0036        | 0.151      | 3783       | 0.752                         | 1.243                         | C    |
| <i>Panthera leo</i>     | extant     | AMNH   | 17274  | 4.690       | 0.0033        | 0.150      | 7463       | 0.416                         | 0.784                         | C    |
|                         |            | AMNH   | 39870  | 4.792       | 0.0029        | 0.150      | 12095      | 0.638                         | 1.068                         | S    |
|                         |            | AMNH   | 52072  | 7.354       | 0.0041        | 0.150      | 8860       | 0.513                         | 0.826                         | S    |
|                         |            | AMNH   | 81830  | 4.723       | 0.0009        | 0.151      | 10966      | 0.633                         | 1.706                         | S    |
|                         |            | AMNH   | 81836  | 6.227       | 0.0019        | 0.151      | 13425      | 0.535                         | 0.829                         | S    |
|                         |            | SAM    | 3983   | 5.929       | 0.0022        | 0.153      | 11358      | 0.831                         | 1.357                         | S    |
|                         |            | SAM    | 14893  | 1.807       | 0.0075        | 2.418      | 14934      | 0.417                         | 0.693                         | C    |
|                         |            | SAM    | 36873  | 6.050       | 0.0046        | 0.150      | 14769      | 0.511                         | 1.158                         | S    |
|                         |            | SAM    | 36874  | 4.617       | 0.0034        | 0.150      | 3852       | 0.541                         | 0.951                         | S    |
|                         |            | SAM    | 38222  | 7.132       | 0.0034        | 0.151      | 14318      | 0.309                         | 0.799                         | S    |
|                         |            | SAM    | 39302  | 2.110       | 0.0011        | 0.816      | 10307      | 0.442                         | 0.783                         | S    |
|                         |            | USNM   | 182297 | 2.582       | 0.0017        | 0.150      | 3710       | 0.263                         | 0.535                         | U    |
|                         |            | USNM   | 216602 | 4.487       | 0.0017        | 0.150      | 3774       | 0.266                         | 0.598                         | U    |

|                         |        |         |          |       |        |        |       |       |       |   |
|-------------------------|--------|---------|----------|-------|--------|--------|-------|-------|-------|---|
|                         |        | USNM    | 236919   | 3.075 | 0.0045 | 0.150  | 11433 | 0.427 | 0.630 | U |
|                         |        | USNM    | 236920   | 3.665 | 0.0041 | 10.147 | 14929 | 0.320 | 0.701 | U |
| <i>Panthera atrox</i>   | pit 67 | LACMHC  | 582      | 1.701 | 0.0029 | 0.267  | 762   | 0.508 | 0.725 | U |
|                         |        | LACMHC  | 586      | 1.059 | 0.0060 | 0.417  | 11244 | 0.365 | 0.509 | U |
|                         |        | LACMHC  | 6985     | 1.938 | 0.0021 | 0.342  | 930   | 0.601 | 0.855 | U |
|                         |        | LACMHC  | 6996     | 1.145 | 0.0029 | 0.267  | 1530  | 0.451 | 0.936 | U |
|                         | pit 4  | LACMHC  | 17025    | 2.076 | 0.0031 | 0.266  | 10345 | 0.324 | 0.492 | U |
|                         |        | LACMHC  | 593      | 2.132 | 0.0048 | 1.083  | 10158 | 0.306 | 0.557 | U |
|                         |        | LACMHC  | 6991     | 2.175 | 0.0046 | 0.708  | 7457  | 0.414 | 0.643 | U |
|                         |        | LACMHC  | 6993     | 1.262 | 0.0028 | 0.417  | 7252  | 0.746 | 0.831 | U |
|                         | pit 3  | LACMHC  | 587      | 0.822 | 0.0042 | 0.508  | 475   | 0.664 | 1.108 | U |
|                         |        | LACMHC  | 597      | 1.213 | 0.0029 | 2.806  | 3920  | 0.695 | 0.807 | U |
|                         | pit 91 | LACMRLP | R15404   | 2.417 | 0.0017 | 0.343  | 341   | 0.388 | 0.577 | U |
|                         |        | LACMRLP | R52033   | 2.376 | 0.0038 | 0.209  | 12683 | 0.463 | 0.719 | U |
|                         | pit 77 | LACMHC  | 595      | 2.049 | 0.0022 | 0.267  | 12617 | 0.448 | 0.578 | U |
|                         |        | LACMHC  | 17031    | 2.371 | 0.0023 | 0.267  | 7063  | 0.429 | 0.508 | U |
|                         |        | LACMHC  | 53639    | 2.438 | 0.0027 | 0.266  | 3984  | 0.473 | 0.536 | U |
| <i>Smilodon fatalis</i> | pit 67 | LACMHC  | 2002-104 | 1.173 | 0.0023 | 0.267  | 3781  | 0.420 | 0.902 | U |
|                         |        | LACMHC  | 2002-213 | 4.590 | 0.0016 | 0.150  | 17830 | 0.344 | 0.556 | U |
|                         |        | LACMHC  | 2002-234 | 3.529 | 0.0009 | 0.150  | 14090 | 0.606 | 1.220 | U |
|                         |        | LACMHC  | 2002-293 | 1.968 | 0.0012 | 10.428 | 12819 | 0.473 | 1.053 | U |
|                         | pit 3  | LACMHC  | 2002-298 | 3.537 | 0.0014 | 0.150  | 4772  | 0.329 | 0.519 | U |
|                         |        | LACMHC  | 2002-60  | 2.560 | 0.0023 | 0.267  | 12956 | 0.463 | 0.714 | U |
|                         |        | LACMHC  | 2002-272 | 1.870 | 0.0054 | 0.416  | 190   | 0.285 | 0.592 | U |
|                         |        | LACMHC  | 2002-622 | 3.349 | 0.0030 | 0.208  | 9884  | 0.232 | 0.452 | U |
|                         | pit 91 | LACMHC  | 2002-828 | 2.808 | 0.0028 | 1.366  | 13621 | 0.588 | 0.691 | U |
|                         |        | LACMHC  | 29184    | 3.113 | 0.0021 | 0.208  | 15579 | 0.474 | 0.589 | U |
|                         |        | LACMRLP | R29082   | 2.428 | 0.0010 | 2.015  | 7642  | 0.287 | 0.542 | U |
|                         |        | LACMRLP | R29093   | 3.398 | 0.0037 | 0.266  | 11232 | 0.343 | 0.530 | U |
|                         |        | LACMRLP | R30102   | 2.484 | 0.0023 | 0.266  | 1066  | 0.371 | 0.548 | U |
|                         |        | LACMRLP | R36452   | 3.368 | 0.0044 | 0.417  | 13831 | 0.351 | 0.438 | U |
|                         |        | LACMRLP | R39815   | 3.325 | 0.0039 | 0.267  | 13894 | 0.369 | 0.652 | U |

Status/pit, if extinct only the pit is noted. All pits are from the La Brea Tar Pits, Los Angeles, California, USA. *Asfc*, area-scale fractal complexity; *epLsar*, anisotropy; *Smc*, scale of maximum complexity; *Tfv*, texture fill volume; *HAsfc*<sub>(3x3)</sub>, *HAsfc*<sub>(9x9)</sub> heterogeneity of complexity in a 3x3 and 9x9 grid, respectively. Data, notes the source of respective data according to the following: S, published in Ref. 18; C, corrected from Ref. 18; U, unpublished data new to this study.
